# Supplementary material
Source: PubMed Central journal article supplement (PMC7278897)
Supplement: NIHMS1588635-supplement-Supp_1.pdf [file NIHMS1588635-supplement-Supp_1.pdf]

**Table S1. Antibodies, related to STAR Methods**

| Antibody                          | SOURCE           |
|-----------------------------------|------------------|
| CD16/CD32 (Mouse Fc Block; 2.4G2) | BD Bioscience    |
| CD45 (30-F11)                     | Biolegend        |
| NK1.1 (PK136)                     | Biolegend        |
| CD3 (17A2)                        | Biolegend        |
| CD8 (53-6.7)                      | Biolegend        |
| CD4 (GK1.5)                       | Biolegend        |
| Gr-1 (RB6-8C5)                    | Biolegend        |
| PD-L1 (CD274;10F.9G2)             | Biolegend        |
| CD31 (390)                        | Biolegend        |
| VCAM-1 (CD106;MVCAM.A)            | Biolegend        |
| P-selectin (CD62P; RMP-1)         | Biolegend        |
| CD69 (H1.2F3)                     | Biolegend        |
| CTLA-4 (CD152; UC10-4B9)          | Biolegend        |
| 2B4 (CD244.2; m2B4 (B6)458.1)     | Biolegend        |
| VLA-4 (CD49d; R1-2)               | Biolegend        |
| F4/80 (BM8)                       | Biolegend        |
| PD-1 (CD279; RMP1-30)             | Biolegend        |
| CD44 (IM7)                        | Biolegend        |
| CD107a (ID4B)                     | Biolegend        |
| CD86 (GL-1)                       | Biolegend        |
| CD11c (N418)                      | Biolegend        |
| CD206 (MMR)                       | Biolegend        |
| Ly6C (HK1.4)                      | Biolegend        |
| Ly6G (1A8)                        | BD Bioscience    |
| MHC-II (M5/114.15.2)              | Biolegend        |
| Granzyme-B (GB11)                 | Biolegend        |
| CD11b (M1/70)                     | BD Bioscience    |
| MHC-I (H-2kb; AF6-88.5.5.3)       | eBioscience      |
| LAG-3 (eBioC9B7W)                 | eBioscience      |
| TNF- $\alpha$ (MP6-XT22)          | eBioscience      |
| IFN- $\gamma$ (XMG1.2)            | Tonbo Bioscience |
| ICAM-1 (AB796)                    | R&D Systems      |
| VEGFR-2 (DC101)                   | BioXcell         |
| NK1.1 (PK136)                     | BioXcell         |
| CD4 (GK1.5)                       | BioXcell         |
| CD8 (2.43)                        | BioXcell         |
| VCAM (M/K-2.7)                    | BioXcell         |
| PSGL-1 (4RA10)                    | BioXcell         |
| ICAM-1 (YN1/1.7.4)                | BioXcell         |
| IL-6 (MP5-20F3)                   | BioXcell         |
| TGF- $\beta$ (1D11.16.8)          | BioXcell         |
| IL-1 $\beta$ (B122)               | BioXcell         |
| PD-1 (RMP1-14)                    | BioXcell         |

|                                                                   |                          |
|-------------------------------------------------------------------|--------------------------|
| CXCL-1 (48415)                                                    | R&D systems              |
| CCL-5 (53405)                                                     | R&D systems              |
| pERK <sup>T202/Y204</sup> (D13.14.4E)                             | Cell Signaling           |
| Cleaved caspase-3 (CC3;5A1E)                                      | Cell Signaling           |
| PDGFR $\beta$ (28E1)                                              | Cell Signaling           |
| NF- $\kappa$ B (p65;D14E12)                                       | Cell Signaling           |
| Ki67 (SP6)                                                        | Abcam                    |
| CD31 (ab28364)                                                    | Abcam                    |
| $\alpha$ -smooth muscle actin ( $\alpha$ SMA;ab5694)              | Abcam                    |
| CD3 (ab5690)                                                      | Abcam                    |
| Granzyme B (ab4059)                                               | Abcam                    |
| pRB <sup>S807/S811</sup> (sc-16670)                               | Santa Cruz               |
| NKp46 (AF2225)                                                    | R&D Systems              |
| VCAM-1 (AF643)                                                    | R&D Systems              |
| ICAM-1 (AF796)                                                    | R&D Systems              |
| FOXP3 (FJK-16s)                                                   | eBioscience              |
| Cytokeratin 19                                                    | University of Iowa       |
| Mouse pan-endothelial cell antigen                                | University of Iowa       |
| P-selectin (LS-B3578)                                             | LSBio                    |
| FAP (ABT11)                                                       | Millipore                |
| CD31 (SZ31)                                                       | Dianova                  |
| Biotinylated hyaluronic acid binding protein (HABP; AMS.HKD-BC41) | AMSBIO                   |
| CD8 (4SM15)                                                       | Thermo Fisher Scientific |
| LYVE-1 (ALY7)                                                     | Thermo Fisher Scientific |
| Anti-pimonidazole mouse IgG1 monoclonal antibody (MAb1)           | Hypoxyprobe.com          |

| IDENTIFIER                        |
|-----------------------------------|
| Cat#553142; RRID:AB_394657        |
| Cat#103128; RRID:AB_493715        |
| Cat#108740; RRID:AB_2562274       |
| Cat#100229; RRID:AB_11204249      |
| Cat#100713; RRID:AB_312752        |
| Cat#100410; RRID:AB_312695        |
| Cat#108424; RRID:AB_2137485       |
| Cat#124321; RRID:AB_2563635       |
| Cat#102419; RRID:AB_10612742      |
| Cat#105717; RRID: AB_1877142      |
| Cat#148309; RRID. AB_2565985      |
| Cat#104526; RRID:AB_10679041      |
| Cat#106323; RRID:AB_2566467       |
| Cat#133513; RRID AB_2564340       |
| Cat#103621; RRID AB_2565776       |
| Cat#123110; RRID AB_893486        |
| Cat#109112; RRID AB_10612938      |
| Cat#103041; RRID AB_11218802      |
| Cat#121612; RRID AB_2134487       |
| Cat#105035; RRID AB_11126147      |
| Cat#117335; RRID AB_11219204      |
| Cat#141727; RRID AB_2565822       |
| Cat#128025; RRID AB_10643867      |
| Cat#563005; RRID:AB_2737946       |
| Cat#107613; RRID AB_313328        |
| Cat#515408; RRID AB_2562196       |
| Cat#563553; RRID:AB_2738276       |
| Cat#12-5958-82; RRID AB_10598797  |
| Cat#17-2231-82; RRID AB_2573184   |
| Cat#17-7321-81; RRID AB_469508    |
| Cat#75-7311-U025; RRID AB_2621970 |
| Cat#FAB796P; RRID AB_2248703      |
| Cat#BE0060; RRID:AB_1107766       |
| Cat#BE0036; RRID:AB_1107737       |
| Cat#BE0003-1; RRID:AB_1107636     |
| Cat#BE0061; RRID:AB_1125541       |
| Cat#BE0027; RRID. AB_1107572      |
| Cat#BE0186; RRID. AB_10950305     |
| Cat#BE0020-1; RRID:AB_1107661     |
| Cat#BE0046; RRID:AB_1107709       |
| Cat#BE0057; RRID. AB_1107757      |
| Cat#BE0246; RRID:AB_2687727       |
| Cat#BE0146; RRID:AB_10949053      |

|                                 |
|---------------------------------|
| Cat#MAB453-SP; RRID:AB_2827952  |
| Cat#MAB478500; RRID AB_2290968  |
| Cat#4370; RRID AB_2315112       |
| Cat#9664; RRID AB_2070042       |
| Cat#3169; RRID AB_2162497       |
| Cat#8242; RRID AB_10859369      |
| Cat#ab16667; RRID AB_302459     |
| Cat#ab28364; RRID AB_726362     |
| Cat#ab5694; RRID AB_2223021     |
| Cat#ab5690; RRID AB_305055      |
| Cat#ab4059; RRID AB_304251      |
| Cat#sc-16670; RRID AB_655250    |
| Cat#AF2225; RRID AB_355192      |
| Cat#AF643; RRID AB_355499       |
| Cat#AF796; RRID AB_2248703      |
| Cat#14-5773-82; RRID AB_467576  |
| Cat#TROMA-III; RRID AB_2133570  |
| Cat#MECA32; RRID AB_531797      |
| Cat#LS-B3578; RRID AB_10629269  |
| Cat#ABT11; RRID AB_11213249     |
| Cat#DIA-310; RRID AB_2631039    |
| Cat#AMS.HKD-BC41                |
| Cat#14-0808-82; RRID:AB_2572861 |
| Cat#14-0443-82; RRID AB_1633414 |
| Cat#HPMAb-1; RRID:AB_2801307    |
