# Supplementary material
Source: PubMed Central journal article supplement (PMC7278897)
Supplement: NIHMS1588635-supplement-Supp_2.pdf [file NIHMS1588635-supplement-Supp_2.pdf]

**Table S2. qPCR primers, related to STAR Methods**

| qPCR primer       | sequence                  | Identifier |
|-------------------|---------------------------|------------|
| Mouse Tnfa Left   | AAGCCTGTAGCCCACGTCGTA     | This paper |
| Mouse Tnfa Right  | GGCACCAGTGTGGTTGTCTTTG    | This paper |
| Mouse Il6 Left    | ACCAGAGGAAATTTTCAATAGGC   | This paper |
| Mouse Il6 Right   | TGATGCACTTGCAGAAAACA      | This paper |
| Mouse Il1b Left   | TTGTTGATGTGCTGCTGTGA      | This paper |
| Mouse Il1b Right  | TGTGAAATGCCACCTTTTGA      | This paper |
| Mouse Il10 Left   | GACCAGCTGGACAACATACTGCTAA | This paper |
| Mouse Il10 Right  | GATAAGGCTTGGCAACCCAAGTAA  | This paper |
| Mouse Tgfb1 Left  | GTGTGGAGCAACATGTGGAACCTCA | This paper |
| Mouse Tgfb1 Right | TTGGTTCAGCCACTGCCGTA      | This paper |
| Mouse Arg1 Left   | AGCTCTGGGAATCTGCATGGGCA   | This paper |
| Mouse Arg1 Right  | CAGGGTCTACGTCTCGCAAGCCA   | This paper |
| Mouse Vegfa Left  | GCACATAGAGAGAATGAGCTTCC   | This paper |
| Mouse Vegfa Right | CTCCGCTCTGAACAAGGCT       | This paper |
| Mouse Cd11b Left  | AAACCACAGTCCCGCAGAGA      | This paper |
| Mouse Cd11b Right | CGTGTTACCAGCTGGCTTA       | This paper |
